# Supplementary figures and images for: Ruminal Bacterial Community Successions in Response to Monensin Supplementation in Goats
Source: MDPI journal article supplement (doi:10.3390/ani12172291), 2022-09-04

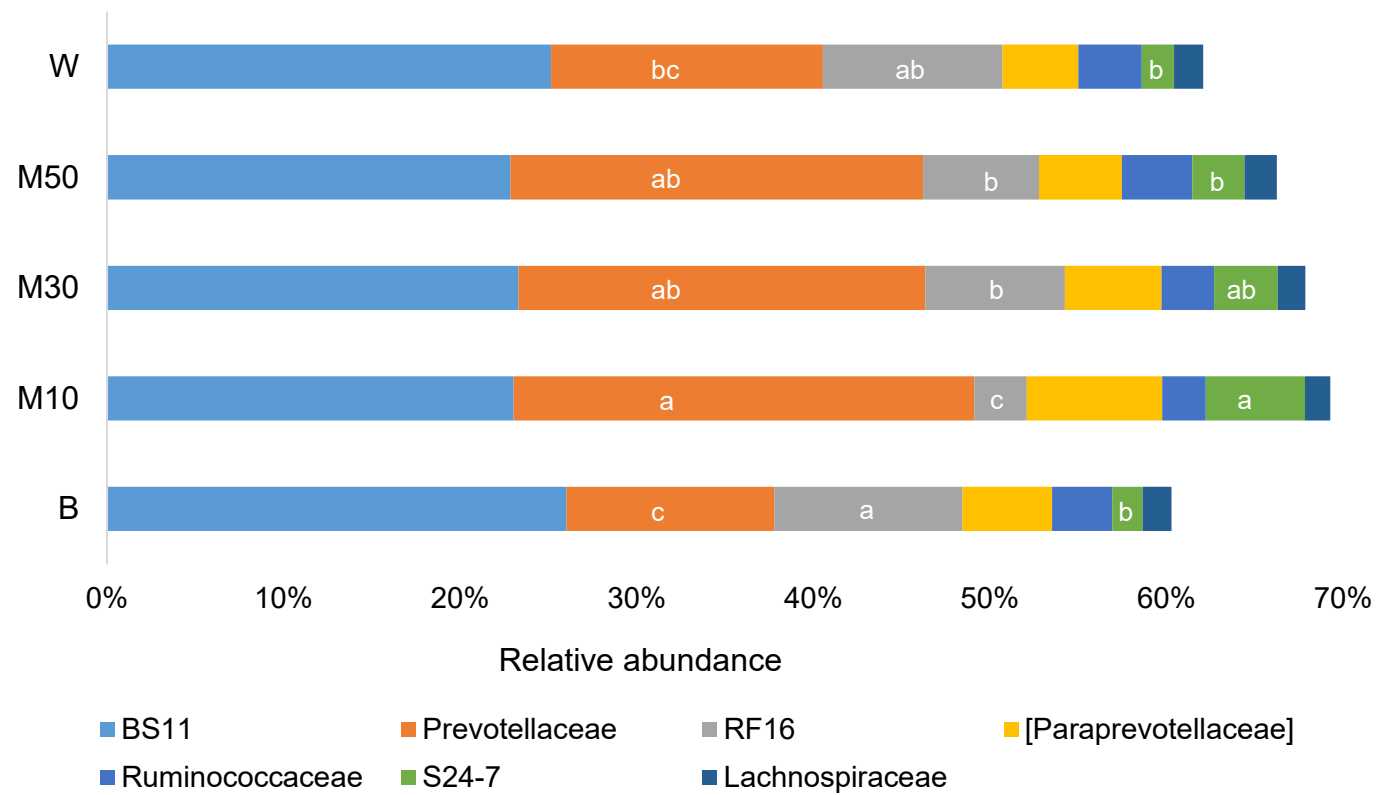

Supplement: s1 [file s1]

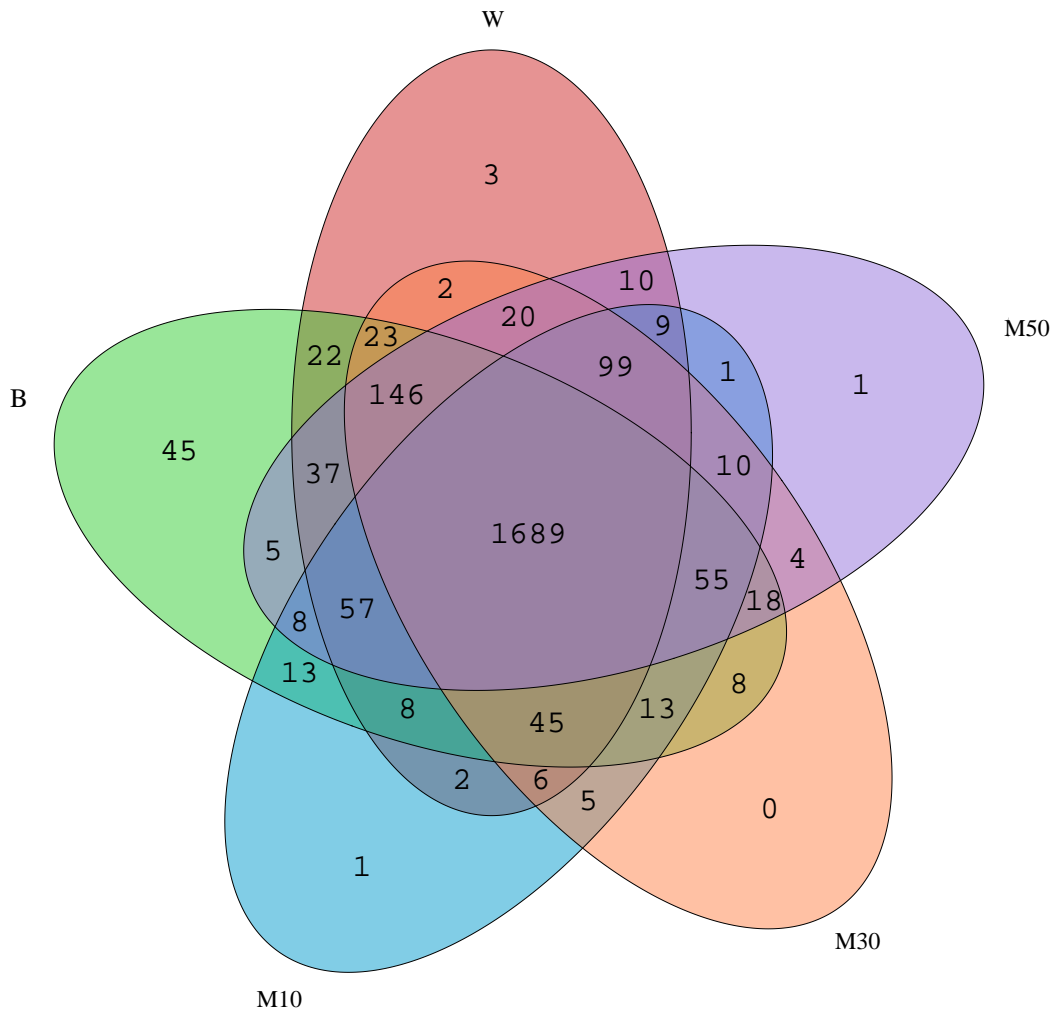

Supplement: s1 [file s1]

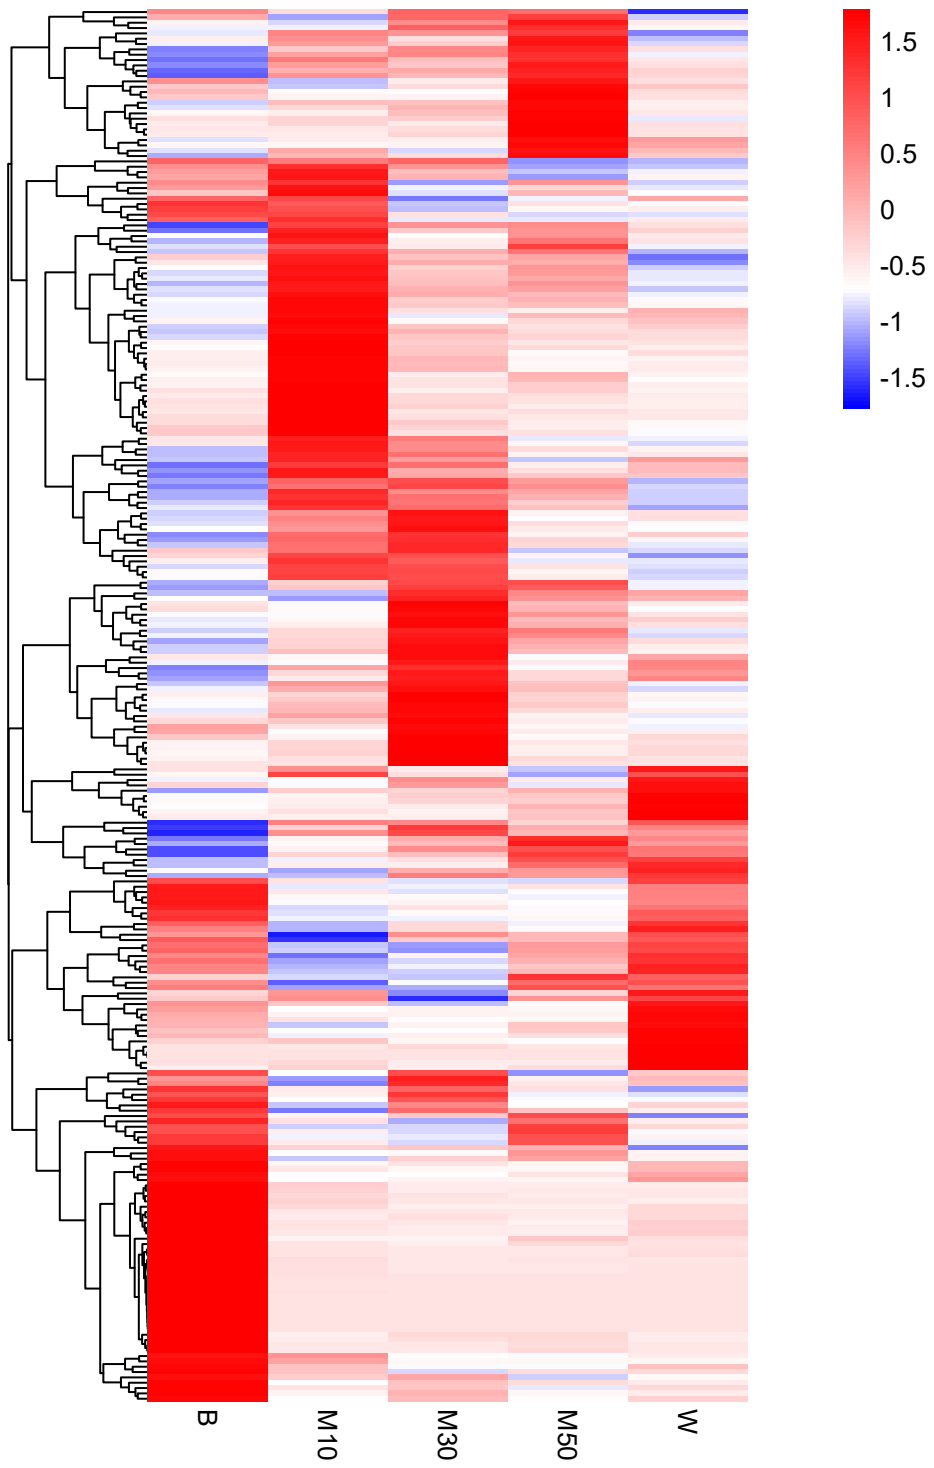

Supplement: s1 [file s1]
